1 **Etiological Factors of *Risk for Occupational Illness* in Nursing**

2 **Professionals: Etiology and Risk Review Protocol**

3

4 Cyntia Leenara Bezerra da Silva<sup>1</sup>, Ana Clara Dantas<sup>1</sup>, Bárbara Ebilizarda  
5 Coutinho Borges<sup>1</sup>, Leandro Melo de Carvalho<sup>1</sup>, Heloise Rosália de Carvalho  
6 Nascimento<sup>1</sup>, Maria Clara Regis de Souza<sup>1</sup>, Allyne Fortes Vitor<sup>1\*</sup>

7

8 <sup>1</sup> Department of Nursing, Federal University of Rio Grande do Norte, Natal, Rio  
9 Grande do Norte, Brazil.

10

11 \* Corresponding author  
12 [allynefortes@gmail.com](mailto:allynefortes@gmail.com) (AFV)

13

14 **Abstract**

15 **Aim:** To describe the protocol for a systematic review of etiology and risk to  
16 identify the etiological factors of *Risk for Occupational Illness* in nursing  
17 professionals.

18 **Design:** Etiology and risk review protocol, conducted according to JBI guidelines.

19 **Methods:** This is an etiology and risk review protocol to be carried out following  
20 the JBI guidelines in the following data sources: CINAHL, MEDLINE/PubMed,  
21 Cochrane Library, Scopus, EMBASE, Latin American and Caribbean Literature  
22 in Health Sciences, National Institute of Security and Health at Work and National  
23 Institute of Health at Work. The inclusion criteria are studies that address workers  
24 aged 18 years until retirement, demonstrate etiological factors that condition the  
25 susceptibility of the ND in question and address analyses regarding the  
26 identification, definition and association of factors with the Risk of Occupational  
27 Illness. The exclusion criteria are studies that did not address the topic, opinion  
28 articles, letters to the editor and editorials.

29 **Expected Results:** The results of this review will be publicly disclosed in  
30 scientific journals in the health area and will contribute to increasing the level of

31 evidence of the Nursing Diagnosis *Risk for Occupational Illness*, so that they  
32 remain in future editions of NANDA International and that the diagnosis is  
33 updated and revised based on the current scientific literature.

34 **Conclusion:** It is expected identify the possible uses of the concept; determine  
35 the essential critical attributes; identify the antecedents and consequences of the  
36 concept; and define the empirical references and to highlight the etiological  
37 factors that are consistent with susceptibility to occupational illness.

38 **Keywords:** Occupational stress; Occupational diseases; etiology; Nursing  
39 diagnosis; Nursing professionals.

40

#### 41 **Strengths and limitations of this study:**

- 42 • This study will review the scientific literature on the etiological factors of *Risk*  
43 *for Occupational Illness* in nursing professionals, providing an increase in the  
44 level of evidence for this Diagnosis;
- 45 • The steps of this review will be followed strictly in accordance with the criteria  
46 of the JBI Manual for Evidence Synthesis;
- 47 • To avoid selection bias, data collection will occur independently with active  
48 blinding of researchers, who will use software to export and select data.

49

#### 50 **Introduction**

51 Workers' health encompasses the interactions between work and the  
52 health-disease process, with activities regulated by the Organic Health Law, Law  
53 nº. 8080/90. This law shows that the State must provide favorable conditions for  
54 the full exercise of the work process. [1]

55           Therefore, economic and social policies are needed that propose the  
56 reduction of risks of diseases and other harm to professionals. In this context, the  
57 standard provides for the conditions for the execution of healthcare through  
58 health surveillance, the promotion, protection and recovery of workers' health. [1]

59           Nursing professionals continuously provide health care 24 hours a day,  
60 sometimes due to a shortage of supplies and in precarious working conditions.  
61 Workers work 30-40 hours a week and, in some situations, have more than one  
62 employment relationship. [2] These facts, combined with the on-call regime,  
63 increase the tiring routine and interpersonal-professional conflicts that have  
64 repercussions on the biological and psychological dimensions, corroborating  
65 occupational illnesses that are largely neglected by the professionals themselves.

66           In general, healthcare professionals naturally present risk factors that are  
67 intensified depending on the conditions they are offered during the execution of  
68 care. For example, many healthcare institutions are considered unhealthy  
69 because they admit patients with a wide range of illnesses and require  
70 procedures that pose risks of accidents and illnesses to the worker. [2]

71           In Brazil, from 2018 to 2022, 329,176 work accidents related to exposure  
72 to biological material were recorded, of which 54.4% were nursing professionals.  
73 [3] Another important event to mention is the increasing number of accident  
74 benefits granted to workers, as a result of serious injuries, musculoskeletal  
75 diseases and mental disorders. [4]

76           Data from the International Labor Organization (2021) indicate that  
77 monetary expenses related to work-related accidents can account for up to 4%  
78 of the world's Gross Domestic Product (GDP). This has the potential to be

79 minimized or even eradicated, as many of these events are preventable as long  
80 as efficient risk management methods are implemented. [4]

81 Professional practice activities can potentially cause injury to workers and  
82 their occurrence is influenced and intensified by probability and severity.  
83 Awareness that occupational exposure to risks occurs in the face of professional-  
84 work environment interaction will allow nurses to develop and adopt a preventive  
85 mindset conducive to implementing strategies to minimize the possible risks of  
86 Occupational Illness. [2,4]

87 In order to develop a care plan that is appropriate for implementing nursing  
88 interventions and achieving expected results, nurses must rely on the Nursing  
89 Process (NP). The NP allows the identification, understanding, measurement and  
90 prediction of the individual's health problems so that an effective and applicable  
91 care plan can be developed. Organized in five interrelated, interdependent,  
92 recurring and cyclical stages: assessment, diagnosis, outcome/planning,  
93 implementation, and evaluation. [5-6]

94 In the NANDA-International (NANDA-I) taxonomy, the Nursing Diagnosis  
95 (ND) *Risk for Occupational Illness* (00404) approved in 2023, belonging to  
96 Domain 11. Safety/protection and Class 4. Environmental risks, presents 29 risk  
97 factors, classified as individual: (1) Difficulty with decision-making, (2) Excessive  
98 stress, (3) Improper use of personal protective equipment, (4) Inaccurate follow-  
99 through of employee health protocol, (5) Inaccurate follow-through to safety  
100 protocol, (6) Inadequate action to address modifiable factors, (7) Inadequate  
101 communication skills, (8) Inadequate knowledge of modifiable factors, (9)  
102 Inadequate social support, (10) Inadequate understanding of the importance of

103 personal protective equipment, (11) Inadequate vaccination, (12) Inattentive to  
104 ergonomic principles, (13) Ineffective weight management. [7]

105 As well as, environmental factors: (1) Conflicted labor relationships, (2)  
106 Excessive workload, (3) Exposure to chemical agents, (4) Exposure to biological  
107 agents, (5) Exposure to intermittent impacts, (6) Exposure to psychosocial  
108 agents, (7) Exposure to repetitive motion activities, (8) Inadequate access to  
109 personal protective equipment, (9) Inadequate adoption of the ergonomic  
110 principle, (10) Inadequate biological monitoring, (11) Inadequate dosimetry  
111 monitoring, (12) Inadequate employee health protocol, (13) Inadequate  
112 placement of collective protective equipment, (14) Inadequate safety protocol,  
113 (15) Ineffective workload management, (16) Pathogen exposure. [7]

114 Highlighting at risk population: (1) Chestfeeding individuals, (2) Individuals  
115 whose work is comprised of monotonous activities, (3) Individuals with history of  
116 physical trauma, (4) Individuals with history of traumatic professional exposure,  
117 (5) Individuals with history of work-related accidents, (6) Individuals with limited  
118 access to healthcare services, (7) Individuals with multiple employment contracts,  
119 (8) Individuals with responsibilities beyond own work ability, (9) Individuals with  
120 work-life imbalance, (10) Pregnant individuals, (11) Rotating shift workers. [7]

121 This ND has the definition: susceptibility to work-related condition or  
122 disorder resulting from a non-instantaneous event or exposure, and presents  
123 level of evidence 2.1, the initial level of a diagnosis approved to compose the  
124 taxonomy. [7]

125 Although NANDA-I presents itself as an estimated classification system,  
126 proposing through diagnostic classifications, the standardization of language  
127 among nursing professionals, it requires that constant theoretical, clinical and

128 content studies be carried out to update the evidence and validity of diagnoses,  
129 to allow the expansion of the use of taxonomy in the most diverse scenarios and  
130 populations. [8]

131 The Nursing Diagnosis validation process is divided into three phases:  
132 concept analysis, content analysis by experts and clinical validation. The Etiology  
133 and Risk review will be necessary for the development of the concept analysis,  
134 the first stage of validation. [9]

135

### 136 **Aims**

137 From this perspective, the following research question was raised: What  
138 are the etiological factors of the *Risk for Occupational Illness* in nursing  
139 professionals?

140

### 141 **Method**

#### 142 **Study**

143 This is an Etiology and Risk Review protocol developed according to the  
144 recommendations of the JBI Manual for Evidence Synthesis, Chapter 7, and the  
145 PRISMA-ScR (Preferred Reporting Items for Systematic Reviews and Meta-  
146 Analyses extension for Scoping Reviews), registered in the International  
147 prospective register of systematic reviews with the respective registration:  
148 CRD4202549181. [10-11] The following steps will be adopted: definition of the  
149 research question, identification of relevant studies, assessment of  
150 methodological quality, data extraction and synthesis of results. [12]

151 This systematic literature review will be carried out with the aim of  
152 operationalizing the development of a concept analysis for the Nursing Diagnosis

153 *Risk for Occupational Illness*. The review will be based on the acronym PEO,  
154 which are: P (population); E (etiology); and O (outcome). [10] Thus, the elements  
155 to be admitted will be P (nursing professionals); E (etiological factors); and O  
156 (*Risk for Occupational Illness*). To be adopted as the research question: “What  
157 are the etiological factors related to the Nursing Diagnosis *Risk for Occupational*  
158 *Illness* in nursing professionals?”

159

## 160 **Information sources**

161 Searches in the literary collection will be carried out through the CAPES  
162 Periodicals Portal, through the Federated Academic Community (CAFe) platform  
163 of the Federal University of Rio Grande do Norte (UFRN) in the respective data  
164 sources: CINAHL (EBSCO), MEDLINE/PubMed (via National Library of  
165 Medicine), Cochrane Library, Scopus (Elsevier), EMBASE and Latin American  
166 and Caribbean Literature in Health Sciences (LILACS). As well as in the National  
167 Institute of Security and Health at Work (INSST) and National Institute of Health  
168 at Work (INST) for comparison between the Brazilian and Spanish scenarios,  
169 since Spain has intense discussion and visibility on the subject. It is worth noting  
170 that no restrictions on language or year of publication will be applied.

171

## 172 **Search strategy**

173 The selection of descriptors used in the search strategy was done by  
174 consulting the Medical Subject Headings (MeSH) and the Health Sciences  
175 Descriptors (DeCS). Seven descriptors and one keyword related to the  
176 phenomenon were defined, in order to contribute to the findings of the available  
177 literature, according to Table 1.

178 **Table 1. Description and characterization of the PEO mnemonic used in the**  
 179 **research.**

| <b>MNEMONIC STRATEGY</b><br><br><b>PEO</b> | <b>DESCRIPTORS</b><br><br><b>DeCS</b>                                                                                      | <b>DESCRIPTORS</b><br><br><b>MESH</b>                                                                                      | <b>KEYWORD</b>                  |
|--------------------------------------------|----------------------------------------------------------------------------------------------------------------------------|----------------------------------------------------------------------------------------------------------------------------|---------------------------------|
| <b>P:</b> Nursing Professionals            | “Nursing Professionals”                                                                                                    | “Nursing professionals”<br>“Nursing Team”                                                                                  | -                               |
| <b>E:</b> Etiological Factors              | “Etiology”                                                                                                                 | “Causality”“Etiology”                                                                                                      | -                               |
| <b>O:</b> Risk for occupational illness    | “Nursing diagnosis”<br>“Occupational risks”<br>“Occupational exposure”<br>“Occupational stress”<br>“Occupational diseases” | “Nursing diagnosis”<br>“Occupational risks”<br>“Occupational exposure”<br>“Occupational stress”<br>“Occupational diseases” | “Risk for occupational illness” |

180

181 The Boolean operators “AND” and “OR” were applied for the purpose of  
 182 crossing the elements referenced by the acronym PEO. [13] The result of  
 183 crossing the components of the acronym PEO with the Boolean operators was:  
 184 “Nursing professionals” OR “Nursing Team” AND “Causality” OR “Etiology” AND



185 “Nursing diagnosis” OR “Occupational risks” OR “Occupational Exposure” OR  
186 “Occupational stress” OR “Occupational diseases” OR “Risk for occupational  
187 illness”.

188 Considering the particularity of each data source, aiming at the greatest  
189 location of scientific evidence, cross-referencing of descriptors was strategically  
190 generated, resulting in product syntaxes (Appendix A).

191

## 192 **Inclusion criteria**

193 As eligibility criteria, studies that address workers from 18 years of age  
194 until retirement, demonstrate etiological factors consistent with the susceptibility  
195 of the ND in question, and address analyses regarding the identification, definition  
196 and association of factors with the *Risk of Occupational Illness* will be considered.  
197 Studies that exclusively present etiological factors related to nursing  
198 professionals and that do not answer the research question will be excluded.  
199 Duplicate studies will be counted only once.

200

## 201 **Selection of sources of evidence**

202 In order to ensure methodological quality and avoid selection bias, the  
203 selection of studies will be carried out independently and under active blinding of  
204 the two researchers using the Rayyan – Intelligent Systematic Review software  
205 (<https://rayyan.ai/>).

206 During the search process, all studies will be evaluated and their inclusion  
207 in the sample will occur after an initial reading of the title and abstract. In case of  
208 disagreement, a third reviewer will be consulted. The entire process follow the

209 PRISMA-ScR flowchart, and will be properly documented detailing of the  
210 selection process.

211 The methodological content of the studies found will be assessed by  
212 applying the checklists for studies available in the JBI manual for each type of  
213 study to be found in the review. [14] In the absence of a cut-off score established  
214 by the JBI, the decision on whether to include or remove a study from the sample  
215 will follow the cut-off score established by the researchers as  $\geq 6$ . It should be  
216 noted that the score for each type of study will be measured based on the  
217 arithmetic mean of the number of items in each list.

218

#### 219 **Data extraction**

220 Data mapping will be performed using a structured data extraction tool in  
221 Microsoft Excel 2019. It will present variables related to the characterization of  
222 the studies, essential attributes, associated conditions and at risk population for  
223 the Nursing Diagnosis Risk for occupational illness. In addition, the identification  
224 of which etiological factors and at risk populations evidenced in the studies are  
225 not present in NANDA-I (Appendix B).

226

#### 227 **Summary of results**

228 In the summary of results, the findings identified by repeated reading of  
229 the studies will be grouped into categories developed by the researchers  
230 according to similarity of concepts. They will be presented in a descriptive  
231 manner, with the possibility of summarizing in tables, charts and other graphic  
232 resources in addition to the discursive text.

233

## 234 **Analysis of evidence**

235           The studies that will make up the sample will undergo an analysis of the  
236 level of evidence, following the guidelines of the JBI approach classification:  
237 levels of evidence, where the following will be evaluated: level 1 – experimental  
238 studies; level 2 – quasi-experimental studies; level 3 – analytical observational  
239 studies; level 4 – descriptive observational studies; level 5 – expert opinion and  
240 bench research. [14] This analysis will fairly discuss the results of the studies  
241 according to the level of evidence presented.

242

## 243 **Ethical Aspects**

244           Considering the nature of the theoretical research and the non-  
245 incorporation of human beings, submission to the Research Ethics Committee  
246 will not be necessary, since the scientific evidence to be used is available in the  
247 public domain.

248

## 249 **Results**

250           The results will include the characterization of the studies in the sample,  
251 highlighting the etiological factors of the ND Risk for Occupational Illness in  
252 nursing professionals.

253           To this end, the results will be presented descriptively using tables and  
254 charts, in order to answer the research question. The studies in the sample will  
255 be organized by figure according to the Preferred Reporting Items for Systematic  
256 Reviews and Meta-Analyses.

257

## 258 **Discussion**

259           The motivation for developing this review is based on the need to  
260 contemplate steps 3, 4, 7 and 8 of the concept analysis for the diagnosis of *Risk*  
261 *of Occupational Illness*, which are named as: identification of possible uses of the  
262 concept; determination of essential critical attributes; identification of antecedents  
263 and consequences of the concept; and definition of empirical references. [15] To  
264 clarify a theoretical gradient with the potential to revise the Nursing Diagnosis in  
265 NANDA-I, understanding the risks likely to threaten the safety and health of the  
266 worker, to attribute visibility to an individual beyond the patient and companion,  
267 the nursing professional.

268           Over the years, nursing has prospered, increasingly expanding the  
269 possibilities of professional practice and increasingly establishing itself as one of  
270 the main health sciences. The growing number of professionals reinforces the  
271 need for standardization of language among members of the nursing team, a fact  
272 made possible through the use of taxonomies, for example, NANDA-I.

273           However, for taxonomies to corroborate evidence-based practice, new  
274 research on *Risk of Occupational Illness* is required, impacting advances in  
275 knowledge regarding the state of the art of the object under study associated with  
276 the validation of the ND in NANDA-I so that its level of evidence is high. [7]

277           The process of validating nursing diagnoses is divided into the following  
278 phases: concept analysis, content analysis by experts, and clinical validation.  
279 Initially, the essential attributes, antecedents, and consequences of a Nursing  
280 Diagnosis are identified. After the concept analysis, the content will be evaluated  
281 by experts, proving its relevance, coherence, clarity, and relevance, so that it can  
282 be validated in clinical scenarios in the future. [9]

283           The definition and knowledge about indicators may result in greater health  
284 care coverage in terms of identifying responses and interventions in a timely  
285 manner with coherent and effective activities. [7,9,16] It is also evident that the  
286 identification of risk factors will enable the establishment of interventions that are  
287 consistent and targeted at the vulnerability presented by the worker, since, given  
288 the probability of prevention, any and all circumstances that make the  
289 professional susceptible to occupational illness will be recognized.

290           The results of this review will be publicly published in scientific journals in  
291 the health field and will contribute to increasing the level of evidence for the  
292 Nursing Diagnosis *Risk of Occupational Illness*, so that they remain in future  
293 editions of NANDA International and that the diagnosis is updated and revised  
294 based on current scientific literature.

295

## 296 **Conclusion**

297           By identifying the possible uses of the concept; determining essential  
298 critical attributes; identifying antecedents and consequences of the concept; and  
299 defining empirical references, it will be possible to highlight the etiological factors  
300 (associated conditions, at risk population, and risk factors) consistent with  
301 susceptibility to occupational illness.

302           Identifying risk factors will enable the establishment of interventions that  
303 are consistent and targeted to the vulnerability presented by the worker, since,  
304 given the probability of prevention, any and all circumstances that make the  
305 professional susceptible to occupational illness will be recognized. Beneficially  
306 impacting the health of the worker and, consequently, optimizing care, reflecting  
307 in a more well-founded care process and in the safety of those involved.

308

## 309 **References**

- 310 1. BRASIL. Presidência da República. LEI Nº 8.080, DE 19 DE  
311 SETEMBRO DE 1990. Brasília, DF, 1990. Available from:  
312 [https://www.planalto.gov.br/ccivil\\_03/leis/l8080.htm](https://www.planalto.gov.br/ccivil_03/leis/l8080.htm)
- 313 2. ALVES NS, OLIVEIRA BA, CARVALHO TA, CARVALHO TA, SAMPAIO  
314 LS, ALMEIDA RO, et al. Riscos Ocupacionais e seus Agravos aos  
315 Profissionais de Enfermagem: Revisão Integrativa da Literatura. Revista  
316 de Casos e Consultoria. 2021;12(1)e25687. Available from:  
317 <https://periodicos.ufrn.br/casoseconsultoria/article/view/25687/14523>
- 318 3. BRASIL. Ministério da Saúde. 17º Boletim epidemiológico – Acidentes  
319 de trabalho com exposição a material biológico em profissionais de  
320 enfermagem, 2018-2022. Brasília, DF: Secretaria de Vigilância em  
321 Saúde e Ambiente, 2023. Available from: <https://www.gov.br/saude/pt-br/centrais-de-conteudo/publicacoes/boletins/epidemiologicos/edicoes/2023/boletim-epidemiologico-volume-54-no-17#:~:text=No%20Brasil%2C%20entre%202018%20e%202022%2C%20foi%20registrado%20um%20total,rela%C3%A7%C3%A3o%20a%20-%20profissionais%20da%20enfermagem.>
- 322  
323  
324  
325  
326  
327
- 328 4. BERMUDES WL. Proposta de uma matriz de risco para programa de  
329 gerenciamento de risco em atividades rotineiras. Vértices.  
330 2021;23(2)580-589. doi: 10.19180/1809-2667.v23n22021p580-589
- 331 5. SANTOS JAS, MACHADO APA, LEITÃO FNC, RAMOS JLS, DABOIN  
332 BEG, COSSON ICO, et al. Nursing assistance systematization:  
333 understanding the care implementation process. J Hum Growth Dev.  
334 2023; 33(2):231- 240. doi: 10.36311/jhgd.v33.14756
- 335 6. ANA. American Nurses Association. The Nursing Process. Estados  
336 Unidos. Available from: <https://www.nursingworld.org/practice-policy/workforce/what-is-nursing/the-nursing-process/>.
- 337  
338 7. NANDA. Diagnósticos de Enfermagem da NANDA-I: Definições e  
339 Classificação 2024-2026 / [NANDA International]. In: Herdman TH,  
340 Kamitsuru S, Lopes CT, editors. Diagnósticos de Enfermagem da

- 341 NANDA-I: Definições e Classificação, 13a ed. New York, NY: Thieme  
342 Medical Publishers, Inc. (2024). 684 p.
- 343 8. BEZERRA DC, FERREIRA CRS, PENA FPS, PEREIRA CS, VIEITAS  
344 DRI, PENA JLC, et al. Systematization of Nursing Assistance:  
345 Perspectives of the Applicability in the Care of the Person with Diabetes  
346 and Hypertension. American Journal of Nursing Science. 2019;8(4):174-  
347 180. doi: 10.1016/10.11648/j.ajns.20190804.19
- 348 9. LOPES MVO, SILVA VM, ARAÚJO TL. Métodos de pesquisa para  
349 validação clínica de conceitos diagnósticos. In: NANDA International,  
350 Inc.; Herdman TH, organizadora. PRONANDA. Porto Alegre: Artmed  
351 Panamericana, 2022. doi: 10.1186/s12877-022-03010-w
- 352 10. MOOLA S, et al. Chapter 7: Systematic reviews of etiology and risk. In:  
353 Aromataris E, Munn Z (Editors). JBI Manual for Evidence Synthesis,  
354 2020. Available from: [https://jbi-global-](https://jbi-global-wiki.refined.site/space/MANUAL/4687372/Chapter+7%3A+Systematic+reviews+of+etiology+and+risk)  
355 [wiki.refined.site/space/MANUAL/4687372/Chapter+7%3A+Systematic+r](https://jbi-global-wiki.refined.site/space/MANUAL/4687372/Chapter+7%3A+Systematic+reviews+of+etiology+and+risk)  
356 [eviews+of+etiology+and+risk](https://jbi-global-wiki.refined.site/space/MANUAL/4687372/Chapter+7%3A+Systematic+reviews+of+etiology+and+risk).
- 357 11. Tricco AC, Lillie E, Zarin W, O'Brien KK, Colquhoun H, Levac D, et al.  
358 PRISMA extension for scoping reviews (PRISMA-ScR): Checklist and  
359 explanation. Ann Intern Med. 2018 Oct 2;169(7):467–73. doi:  
360 10.7326/M18-0850
- 361 12. KHAN KS, KUNZ R, KLEIJNEN J, ANTES G. Five steps to conducting a  
362 systematic review. J R Soc Med. 2003;96(3):118-21. doi:  
363 10.1177/014107680309600304
- 364 13. CAVALCANTE YA. Validação de conteúdo do diagnóstico de  
365 enfermagem “Síndrome Pós-Trauma” no contexto da violência contra a  
366 mulher. 2022. 236f. Dissertação (Mestrado em Enfermagem) - Programa  
367 de Pós-Graduação em Enfermagem, Universidade Federal do Ceará,  
368 Fortaleza, 2022.
- 369 14. JBI. The JBI approach: Levels of evidence. 2013; Available from:  
370 [https://jbi.global/sites/default/files/2019-05/JBI-Levels-of-](https://jbi.global/sites/default/files/2019-05/JBI-Levels-of-evidence_2014_0.pdf)  
371 [evidence\\_2014\\_0.pdf](https://jbi.global/sites/default/files/2019-05/JBI-Levels-of-evidence_2014_0.pdf)
- 372 15. WALKER LO, AVANT KC. Strategies for Theory Construction in Nursing.  
373 Pearson Education; 2019.

374 16. PAANS W. et al. Do knowledge, knowledge sources and reasoning skills  
375 affect the accuracy of nursing diagnoses? a randomised study. **BMC**  
376 **Nurs.** 2012;11. Doi: 10.1186/1472-6955-11-1  
377

378 **Conflict of interest**

379 None

380

381 **Supporting information**

382 S1 Table. Table 1. Description and characterization of the PEO mnemonic used  
383 in the research.

384 S1 File. Appendix for Search strategies for each database and extraction  
385 instrument.

386

387 **FUNDING/ACKNOWLEDGEMENT**

388 Coordination for the Improvement of Higher Education Personnel -  
389 doctoral scholarship for Dantas AC, Borges BEC and Carvalho LM and master's  
390 scholarship for Silva CLB; the National Council for Scientific Technological  
391 Development for Vitor AF under funding code 3061062022-1; and by the  
392 Universal CNPq project no. 408730/2023-4.
